# Supplementary material
Source: MDPI journal article supplement (https://www.mdpi.com/2072-4292/9/5/503)
Supplement: s1 [file s1]

Archive with 2 entries (2 files):
- Table S1.docx
- Figure S1.pdf
