# Supplementary material
Source: MDPI journal article supplement (https://www.mdpi.com/2072-4292/9/5/503)
Supplement: s1 [file s1 › Table S1.docx]

| **No. of events** | **Min**  **(mm/h)** | **Max**  **(mm/h)** | **COR** | **BIAS**  **(mm/h)** | **RMSE**  **(mm/h)** | **RBIAS**  **(%)** |
| --- | --- | --- | --- | --- | --- | --- |
| 130 | 35.79 | 74.42 | 0.22 | -40.19 | 41.32 | -89.06 |
