# Supplementary material
Source: MDPI journal article supplement (https://www.mdpi.com/2072-4292/9/5/503)

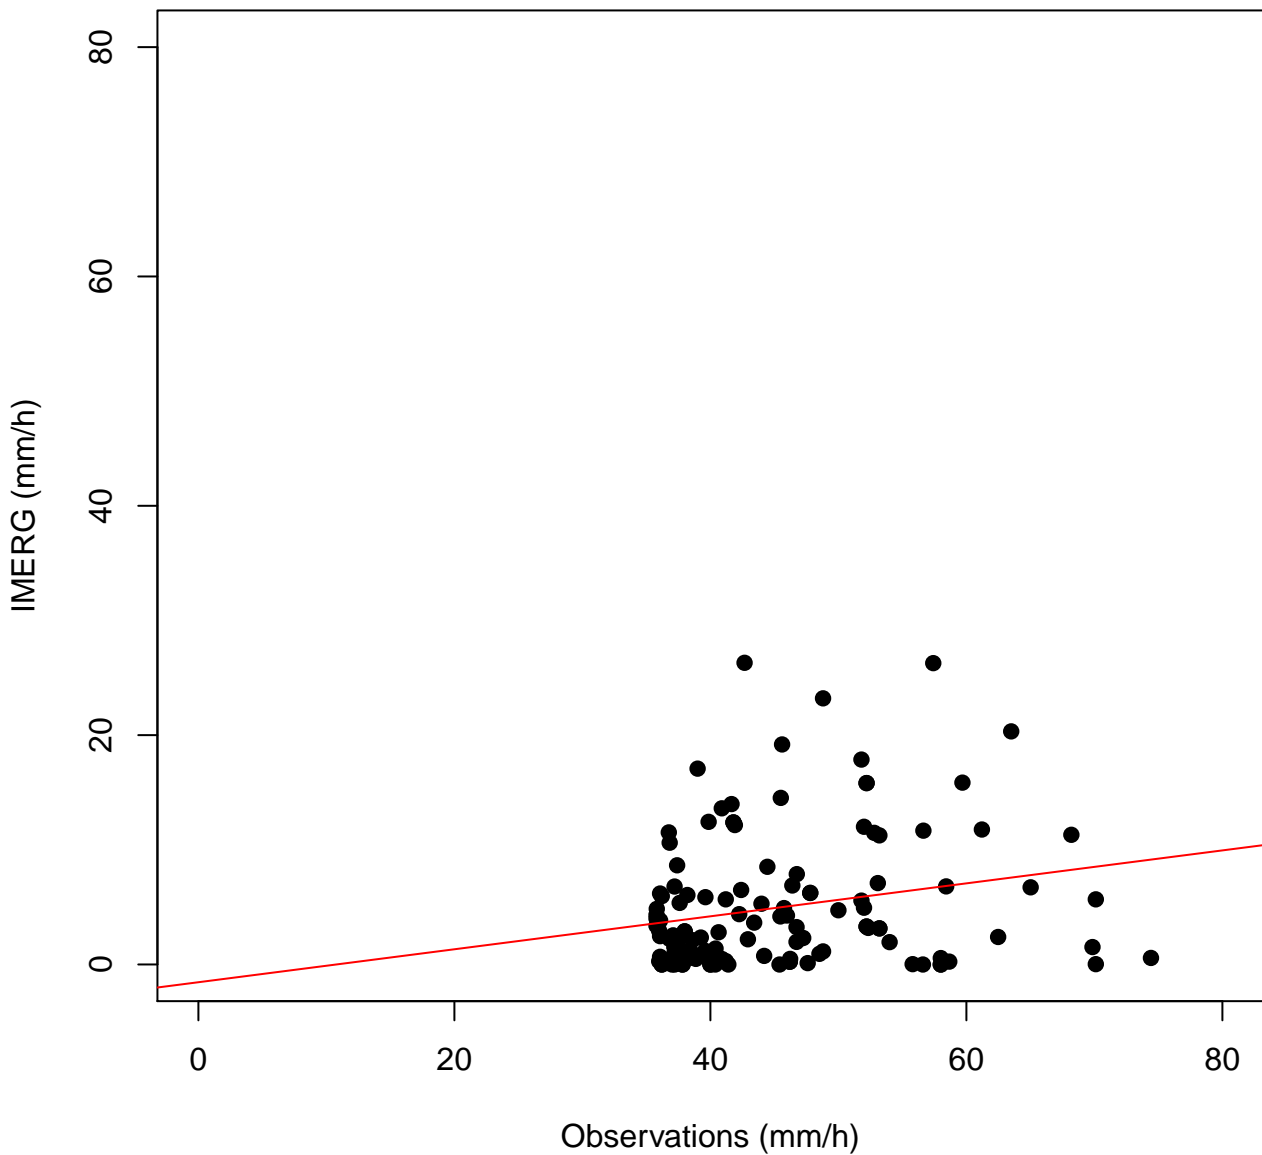

Supplement: s1 [file s1]
